# Supplementary material for: Enhancement of photovoltaic performance of TiO2-based dye-sensitized solar cells by doping Ca3La3(1−x)Eu3x(BO3)5
Source: Royal Society of Chemistry journal article supplement (doi:10.1039/c4ta05723f), 2015-01-01
Supplement: c4ta05723f1.pdf [file c4ta05723f1.pdf]

**Enhancement of Photovoltaic Performance of TiO<sub>2</sub>-Based Dye-sensitized Solar  
Cells by doping Ca<sub>3</sub>La<sub>3(1-x)</sub>Eu<sub>3x</sub>(BO<sub>3</sub>)<sub>5</sub>**

W. B. Dai <sup>a, \*</sup>, Y. F. Lei <sup>b</sup>, P. Li <sup>c</sup>, L. F. Xu <sup>d</sup>

<sup>a</sup> State key laboratory of luminescent materials and devices, South China University of Technology, Guangzhou, Guangdong, China, 510640.

<sup>b</sup> State key laboratory for biological effects of nanomaterials and nanosafety, National Center for Nanoscience and Technology, Beijing, China, 100190.

<sup>c</sup> Guangzhou institute of energy conversion, Chinese Academy of Sciences, Guangzhou, Guangdong, China, 510640.

<sup>d</sup> School of materials science and engineering, South China University of Technology, Guangzhou, Guangdong, China, 510640.

\* Author to whom correspondence should be addressed, E-mail: [wubin.dai@foxmail.com](mailto:wubin.dai@foxmail.com)

**Preparation of TiO<sub>2</sub> nanoparticle:**

TiO<sub>2</sub> colloid was prepared by means of the modified hydrothermal method combined with both the hydrothermal and sol-gel treatments, in which tetraisopropyl titanate was used as a precursor, acetic anhydride as a hydrolysis inhibitor, and the concentrated nitric acid as a peptizing agent. In a typical procedure, a mixture of 7.2 ml tetraisopropyl titanate and 1.6 ml acetic anhydride was added dropwise into 36.0 ml deionized water in a four-neck flask. After stirring for about 1 h, 0.5 ml of the concentrated nitric acid (16 mol/L) was added in drops to the mixture solution, the solution was peptized for 75 min in a water bath with temperature is kept at 80 °C under the conditions of ultrasonic vibration and magnetic stirring. To accomplish a complete hydrolysis reaction, the stirring for 90 min was required. After cooling down, the mixture was diluted with deionized water to final 46.5 ml. The resulting gelatin like was loaded into titanium autoclave and heated at 230 °C for 24 h. Subsequently, the obtained suspension-containing precipitate was diluted with absolute ethanol to 100 ml and thoroughly dispersed under ultrasonic vibration at atmospheric conditions until a homogeneously dispersed and stable colloid appeared. Finally, it was concentrated by a rotary evaporator and was centrifuged to produce a colloidal solution containing 40 wt.% TiO<sub>2</sub> in ethanol.

Table S1 Instrumental parameters of the D<sub>8</sub> Bruker diffractometer used for Rietveld refinements of Ca<sub>3</sub>La<sub>3</sub>(BO<sub>3</sub>)<sub>5</sub> and its derivations phosphors

|                                 |            |
|---------------------------------|------------|
| Primary and second radius       | 217.5 mm   |
| Receiving slit length           | 16 mm      |
| Glancing angle                  | 13.65 °    |
| Source and sample length        | 12 mm      |
| Primary soller slit aperture    | 2.5 °      |
| Reception slit divergence angle | 0.2 °      |
| Receiving slit width            | 0.1 mm     |
| Peak-shape function             | Lorentzian |

Table S2 Selected bond distances and bond angles for CLBO HL

| Distance(Å)                                      | Angle(deg)           |                                                 |           |
|--------------------------------------------------|----------------------|-------------------------------------------------|-----------|
| Ca-O polyhedral coordination (8-CN) <sup>1</sup> |                      |                                                 |           |
| Ca(1)-O (1)×4                                    | 2.45(2) <sup>2</sup> | O(4) <sup>i</sup> -Ca(1)-O(4) <sup>ii</sup>     | 93.63(2)  |
| Ca(1)-O (3)×2                                    | 2.39(1)              | O(4) <sup>i</sup> -Ca(1)-O(1) <sup>iv</sup>     | 80.00(2)  |
| Ca(1)-O (4)×2                                    | 2.37(3)              | O(3)-Ca(1)-O(3) <sup>v</sup>                    | 144.76(3) |
|                                                  |                      | O(1) <sup>iii</sup> -Ca(1)-O(1) <sup>iv</sup>   | 92.69(2)  |
|                                                  |                      | O(1) <sup>iii</sup> -Ca(1)-O(3)                 | 77.81(3)  |
| La-O polyhedral coordination (10-CN)             |                      |                                                 |           |
| La(1)-O(1)×4                                     | 2.65(2)              | O(4) <sup>x</sup> -La(1)-O(3) <sup>xiv</sup>    | 64.58(2)  |
| La(1)-O(2)×3                                     | 2.60(3)              | O(3) <sup>xiv</sup> -La(1)-O(3) <sup>xv</sup>   | 50.71(3)  |
| La(1)-O(3)×2                                     | 2.74(3)              | O(3)-La(1)-O(1) <sup>ii</sup>                   | 73.76(2)  |
| La(1)-O(4)                                       | 2.56(2)              | O(2) <sup>x</sup> -La(1)-O(2) <sup>xi</sup>     | 82.13(2)  |
|                                                  |                      | O(1) <sup>viii</sup> -La(1)-O(2) <sup>xii</sup> | 71.37(3)  |
| B-O tetrahedron coordination (3-CN)              |                      |                                                 |           |
| B(1)-O(4)×2                                      | 1.36(2)              | O(4) <sup>i</sup> -B(1)-O(1) <sup>iv</sup>      | 119.76(2) |
| B(1)-O(1)                                        | 1.39(3)              | O(1) <sup>iii</sup> -B(1)-O(1) <sup>iv</sup>    | 120.58(3) |
| B(2)-O(2)×3                                      | 1.39(3)              | O(2) <sup>x</sup> -B(2)-O(2) <sup>xi</sup>      | 120.00(2) |
| B(3)-O(3)×3                                      | 1.38(2)              | O(3) <sup>xiv</sup> -B(3)-O(3) <sup>v</sup>     | 119.89(2) |

<sup>1</sup> Symmetry codes: i) -y+1, x-y+1,z; ii) -x+y, -x+1, z; iii) x-y+1, x, z+0.5; iv) -x+1,-x+y, z+0.5; v)-x+1, -y+1, z+0.5; viii) y-1, x, z-0.5; x) x, y, z-1; xi) x-y+1, x+1, z-0.5; xii) y-1, -x+y, z-0.5; xiv) x-y, x, z-0.5; xv) y, -x+y+1, z-0.5; <sup>2</sup> average value.

**Figure S1:**

Photovoltaic properties of DSSC for the 15  $\mu\text{m}$  thick  $\text{Eu}^{3+}$ -doped  $\text{TiO}_2$  electrodes were measured under a simulated solar light irradiation of  $100 \text{ mW}/\text{cm}^2$  as shown in Fig. S1. Obviously, with the increase of CLBO:  $0.06\text{Eu}^{3+}$  amount in the DSSC (Fig.S1(a)), the photovoltaic performance has the same tendency with the 3  $\mu\text{m}$  thick  $\text{Eu}^{3+}$ -doped  $\text{TiO}_2$  electrodes as shown in Fig.4(d). However, the doping concentration quenching is different (7% vs. 6%). Meanwhile, the photovoltaic performance is slightly improved as shown in Fig.S1(b) when doped the same amount of CLBO:  $0.06\text{Eu}^{3+}$  in the 3  $\mu\text{m}$  thick (red line) and 15  $\mu\text{m}$  thick  $\text{Eu}^{3+}$ -doped  $\text{TiO}_2$  photoelectrode (green line). These phenomena maybe due to the better dispersion or (and) less phase and domain interfaces for the CLBO:  $0.06\text{Eu}^{3+}$  in the 15  $\mu\text{m}$  thick  $\text{Eu}^{3+}$ -doped  $\text{TiO}_2$  electrode when compared with 3  $\mu\text{m}$  thick  $\text{Eu}^{3+}$ -doped  $\text{TiO}_2$  electrode (the interfaces can capture photo-generated electrons and holes, hinder the charge carrier transportation, leading to a decrease in photocurrent).

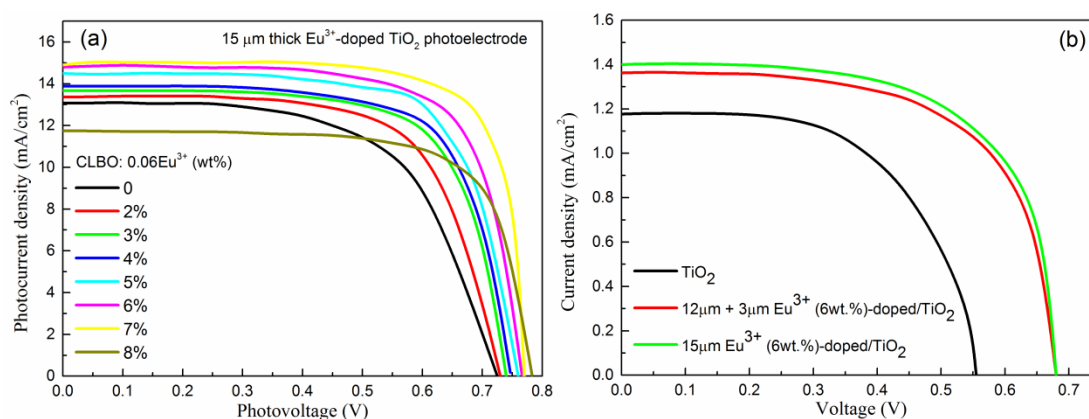

Fig.S1 a)  $I$ - $V$  curves of the DSSC contains different amount of CLBO:  $0.06\text{Eu}^{3+}$  doping under a simulated solar light irradiation for the 15  $\mu\text{m}$  thick co-sensitized  $\text{TiO}_2$  photoelectrodes, b) comparison of the  $I$ - $V$  curves of DSSCs without and with CLBO:  $0.06\text{Eu}^{3+}$  doping in the forms of 3  $\mu\text{m}$  thick and 15  $\mu\text{m}$  thick  $\text{Eu}^{3+}$ -doped  $\text{TiO}_2$  photoelectrode, respectively.

**Figure S2:**

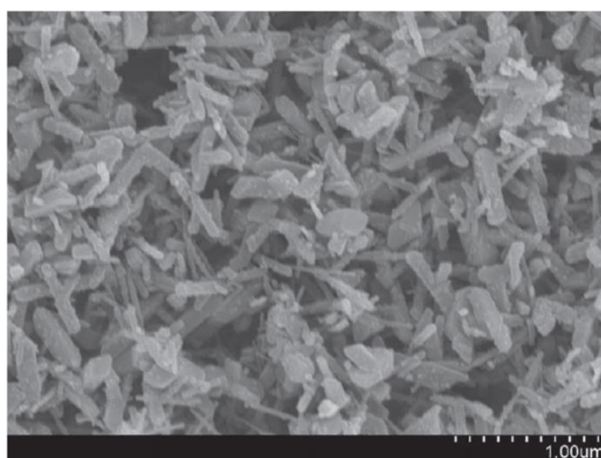

Fig.S2. SEM image of CLBO: 6% $\text{Eu}^{3+}$  (2wt.%) doped in  $\text{TiO}_2$  film

Figure S3:

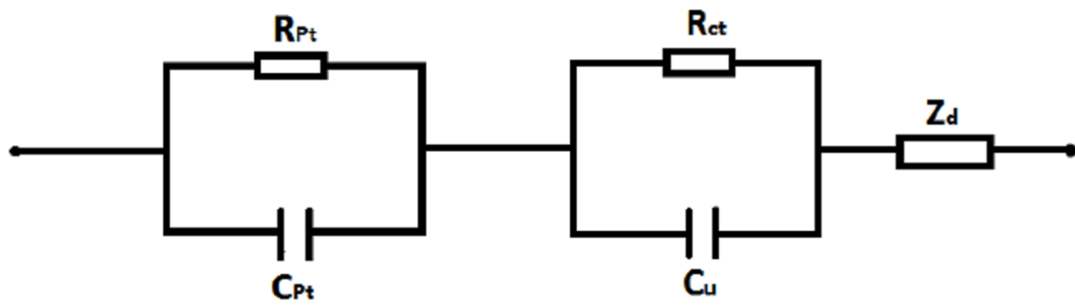

Fig.S3. Simulation circuit to model the DSSC.  $R_{ct}$  and  $C_u$  stand for the resistance and capacitance on the interface of  $TiO_2$  electrode and electrode,  $R_{Pt}$  and  $C_{Pt}$  represent the resistance and capacitance on the interface of electrolyte and Pt doped counter electrode, respectively.  $Z_d$  is the impedance of  $I/I_3^-$  diffusing in electrolyte.
